# Supplementary material
Source: PubMed Central journal article supplement (PMC2736686)
Supplement: NIHMS131229-supplement-1.pdf [file NIHMS131229-supplement-1.pdf]

**Supplemental Table I.** Real-time PCR analysis (mRNA levels) of selected cysteinyl cathepsins, their endogenous inhibitor cystatins, and housekeeping genes during human preadipocyte adipogenesis.

| Name        | Preadipocytes (n=3) |        | Adipocytes (n=3) |         | Fold of Increase | p Value* |
|-------------|---------------------|--------|------------------|---------|------------------|----------|
|             | Mean                | SEM    | Mean             | SEM     |                  |          |
| Cathepsin B | 86,739              | 1,097  | 292,515          | 22,213  | 3.4              | 0.049    |
| Cathepsin C | 13,185              | 1,459  | 22,955           | 602     | 1.7              | 0.049    |
| Cathepsin K | 17,173              | 714    | 203,086          | 49,286  | 11.8             | 0.049    |
| Cathepsin L | 44,672              | 297    | 124,653          | 33,565  | 2.8              | 0.049    |
| Cathepsin S | 239                 | 10     | 2,913            | 310     | 12.2             | 0.049    |
| Cystatin A  | 2,012               | 241    | 7,204            | 1,926   | 3.6              | 0.049    |
| Cystatin C  | 191,097             | 22,594 | 204,132          | 5,911   | 1.1              | 0.513    |
| Cystatin F  | 182                 | 68     | 415              | 246     | 2.3              | 0.275    |
| Cystatin M  | 3                   | 3      | 115              | 41      | 38               | 0.049    |
| Cystatin S  | 169                 | 94     | 1,191            | 504     | 7.0              | 0.127    |
| Cystatin SN | 201                 | 104    | 1,257            | 539     | 6.3              | 0.127    |
| RPL13A      | 272,409             | 24,232 | 390,517          | 19,066  | 1.43             | 0.049    |
| GAPDH       | 979,470             | 35,655 | 1,269,507        | 37,657  | 1.30             | 0.049    |
| EEF1A1      | 3,663,638           | 56,769 | 3,504,961        | 124,081 | 0.96             | 0.275    |
| PPIA        | 441,763             | 6,944  | 462,733          | 16,902  | 1.05             | 0.275    |
| Ubiquitin   | 389,957             | 6,019  | 390,845          | 18,451  | 1.00             | 0.513    |

\* Non-parametric Mann-Whitney Test.  $P < 0.05$  were considered significant.
