# Supplementary material
Source: PubMed Central journal article supplement (PMC2736686)
Supplement: NIHMS131229-supplement-2.pdf [file NIHMS131229-supplement-2.pdf]

**Supplemental Table II: Energy expenditure analysis in CatK-deficient female mice.**

| <b>Parameters</b>                      | <b>CatK<sup>+/+</sup><br/>(n=10)</b> | <b>CatK<sup>-/-</sup><br/>(n=5)</b> | <b>P<br/>Values*</b> |
|----------------------------------------|--------------------------------------|-------------------------------------|----------------------|
| Food Consumption<br>(gram/24 hrs)      | 3.03 ± 0.33                          | 3.84 ± 0.27                         | 0.10                 |
| Water Consumption<br>(ml/24 hrs)       | 6.30 ± 0.75                          | 7.20 ± 0.44                         | 0.81                 |
| Fecal Output<br>(gram/24 hrs)          | 1.61 ± 0.22                          | 2.06 ± 0.23                         | 0.16                 |
| Urine Volume<br>(ml/24 hrs)            | 1.50 ± 0.15                          | 1.80 ± 0.31                         | 0.50                 |
| O <sub>2</sub> Consumption<br>(ml/min) | 3.34 ± 0.13                          | 3.03 ± 0.22                         | 0.22                 |
| CO <sub>2</sub> Production<br>(ml/min) | 2.11 ± 0.11                          | 1.75 ± 0.13                         | 0.06                 |
| Metabolic Rate**<br>(cal/min)          | 15.53 ± 0.63                         | 13.87 ± 0.99                        | 0.18                 |

\*Non-parametric Mann Whitney test.

\*\*Metabolic rate =  $V_{CO_2} \times 1.106 + V_{O_2} \times 3.941$ .
